# Supplementary material
Source: PubMed Central journal article supplement (PMC6466749)
Supplement: Supplemental_Material.pdf [file Supplemental_Material.pdf]

| Study name        | Subgroup within study                                                      | Comparison  | Time point | Statistics for each study |             |             |          |         | Event rate and 95% CI |
|-------------------|----------------------------------------------------------------------------|-------------|------------|---------------------------|-------------|-------------|----------|---------|-----------------------|
|                   |                                                                            |             |            | Event rate                | Lower limit | Upper limit | Z-Value  | p-Value |                       |
| Kronborg O 1      | Population based clinical trial with gFOBT and colonoscopy                 | Denmark     | 1996       | 0.837                     | 0.782       | 0.881       | 8.865    | 0.000   |                       |
| Kronborg O 3      | Population based clinical trial with gFOBT and colonoscopy                 | Denmark     | 1996       | 0.893                     | 0.835       | 0.932       | 8.271    | 0.000   |                       |
| Kronborg O 5      | Population based clinical trial with gFOBT and colonoscopy                 | Denmark     | 1996       | 0.821                     | 0.752       | 0.874       | 7.178    | 0.000   |                       |
| Kronborg O 7      | Population based clinical trial with gFOBT and colonoscopy                 | Denmark     | 1996       | 0.840                     | 0.782       | 0.885       | 8.597    | 0.000   |                       |
| Kronborg O 9      | Population based clinical trial with gFOBT and colonoscopy                 | Denmark     | 1996       | 0.816                     | 0.764       | 0.859       | 9.326    | 0.000   |                       |
| Niv Y             | Population based clinical trial with gFOBT and colonoscopy                 | Israel      | 2002       | 0.998                     | 0.967       | 1.000       | 4.335    | 0.000   |                       |
| W.Ko C 1          | Population based clinical trial with gFOBT and colonoscopy                 | USA         | 2003       | 0.525                     | 0.436       | 0.612       | 0.543    | 0.587   |                       |
| Van Rossum L 1    | Population based clinical trial with gFOBT and colonoscopy                 | Netherlands | 2008       | 0.880                     | 0.808       | 0.928       | 7.006    | 0.000   |                       |
| Singh H 1         | Population based clinical trial with gFOBT and colonoscopy                 | USA         | 2009       | 0.362                     | 0.328       | 0.397       | -7.463   | 0.000   |                       |
| Levi Z 2          | Population based clinical trial with gFOBT and colonoscopy                 | Israel      | 2011       | 0.716                     | 0.613       | 0.800       | 3.910    | 0.000   |                       |
| Moss S            | Population based clinical trial with gFOBT and colonoscopy                 | UK          | 2012       | 0.786                     | 0.753       | 0.816       | 13.633   | 0.000   |                       |
| Inadomi J         | Population based clinical trial with gFOBT and colonoscopy                 | USA         | 2012       | 0.625                     | 0.285       | 0.875       | 0.699    | 0.484   |                       |
| Scholefield JH    | Population based clinical trial with gFOBT and colonoscopy                 | UK          | 2012       | 0.719                     | 0.699       | 0.738       | 19.122   | 0.000   |                       |
| Pitk?niemi J      | Population based clinical trial with gFOBT and colonoscopy                 | Finland     | 2015       | 0.840                     | 0.833       | 0.847       | 63.008   | 0.000   |                       |
| Myres R           | Population screening program with gFOBT and colonoscopy                    | USA         | 1993       | 0.253                     | 0.193       | 0.325       | -6.064   | 0.000   |                       |
| Baig N            | Population screening program with gFOBT and colonoscopy                    | USA         | 2003       | 0.534                     | 0.493       | 0.576       | 1.613    | 0.107   |                       |
| Etzioni D 1       | Population screening program with gFOBT and colonoscopy                    | USA         | 2006       | 0.505                     | 0.450       | 0.560       | 0.170    | 0.865   |                       |
| Manfredi S        | Population screening program with gFOBT and colonoscopy                    | France      | 2008       | 0.907                     | 0.895       | 0.918       | 32.918   | 0.000   |                       |
| Seeff LC          | Population screening program with gFOBT and colonoscopy                    | USA         | 2013       | 0.822                     | 0.767       | 0.867       | 8.783    | 0.000   |                       |
| Rabeneck L        | Population screening program with gFOBT and colonoscopy                    | Canada      | 2014       | 0.746                     | 0.740       | 0.752       | 67.540   | 0.000   |                       |
| Stock D           | Population screening program with gFOBT and colonoscopy                    | Canada      | 2015       | 0.338                     | 0.334       | 0.343       | -62.771  | 0.000   |                       |
| Sieg A            | Population based clinical trial with FIT and colonoscopy with Albumin test | Germany     | 1998       | 0.821                     | 0.766       | 0.866       | 8.748    | 0.000   |                       |
| W.Ko C 2          | Population based clinical trial with FIT and colonoscopy                   | USA         | 2003       | 0.539                     | 0.452       | 0.623       | 0.883    | 0.377   |                       |
| Segnan N          | Population based clinical trial with FIT and colonoscopy                   | Italy       | 2007       | 0.880                     | 0.797       | 0.933       | 6.213    | 0.000   |                       |
| Van Rossum L 2    | Population based clinical trial with FIT and colonoscopy                   | Netherlands | 2008       | 0.826                     | 0.782       | 0.863       | 10.871   | 0.000   |                       |
| Janda M           | Population based clinical trial with FIT and colonoscopy                   | Australia   | 2010       | 0.920                     | 0.864       | 0.954       | 8.115    | 0.000   |                       |
| Levi Z 1          | Population based clinical trial with FIT and colonoscopy                   | Israel      | 2011       | 0.706                     | 0.629       | 0.773       | 4.934    | 0.000   |                       |
| Gupta S           | Population based clinical trial with FIT and colonoscopy                   | USA         | 2013       | 0.817                     | 0.698       | 0.895       | 4.478    | 0.000   |                       |
| Kapidzic A 1      | Population based clinical trial with FIT and colonoscopy 1st round         | Netherlands | 2015       | 0.958                     | 0.932       | 0.974       | 12.232   | 0.000   |                       |
| Kapidzic A 2      | Population based clinical trial with FIT and colonoscopy 2nd round         | Netherlands | 2015       | 0.970                     | 0.938       | 0.985       | 9.017    | 0.000   |                       |
| Kapidzic A 3      | Population based clinical trial with FIT and colonoscopy 3rd round         | Netherlands | 2015       | 0.948                     | 0.908       | 0.971       | 9.366    | 0.000   |                       |
| Stegeman I 1      | Population based clinical trial with FIT and colonoscopy 1st round         | Netherlands | 2015       | 0.798                     | 0.742       | 0.845       | 8.426    | 0.000   |                       |
| Stegeman I 2      | Population based clinical trial with FIT and colonoscopy 2nd round         | Netherlands | 2015       | 0.839                     | 0.779       | 0.885       | 8.270    | 0.000   |                       |
| Stegeman I 3      | Population based clinical trial with FIT and colonoscopy 3rd round         | Netherlands | 2015       | 0.804                     | 0.733       | 0.859       | 6.929    | 0.000   |                       |
| Wong M            | Population based clinical trial with FIT and colonoscopy                   | Hong kong   | 2015       | 0.898                     | 0.863       | 0.925       | 12.866   | 0.000   |                       |
| Panic N           | Population based clinical trial with FIT and colonoscopy                   | Montenegro  | 2015       | 0.968                     | 0.907       | 0.990       | 5.835    | 0.000   |                       |
| Grobbee E 2       | Population based clinical trial with FIT and colonoscopy                   | Holand      | 2016       | 0.999                     | 0.978       | 1.000       | 4.636    | 0.000   |                       |
| Grobbee E 1       | Population based clinical trial with FIT and colonoscopy                   | Holand      | 2016       | 0.910                     | 0.881       | 0.933       | 14.492   | 0.000   |                       |
| Jensen C 1        | Population based clinical trial with FIT and colonoscopy 1st round         | USA         | 2016       | 0.755                     | 0.749       | 0.762       | 61.365   | 0.000   |                       |
| Jensen C 2        | Population based clinical trial with FIT and colonoscopy 2nd round         | USA         | 2016       | 0.805                     | 0.795       | 0.814       | 47.424   | 0.000   |                       |
| Jensen C 3        | Population based clinical trial with FIT and colonoscopy 3rd round         | USA         | 2016       | 0.805                     | 0.795       | 0.815       | 43.879   | 0.000   |                       |
| Jensen C 4        | Population based clinical trial with FIT and colonoscopy 4th round         | USA         | 2016       | 0.811                     | 0.801       | 0.821       | 44.974   | 0.000   |                       |
| Teixeira CR       | Population based clinical trial with FIT and colonoscopy                   | Brazil      | 2017       | 0.793                     | 0.699       | 0.864       | 5.226    | 0.000   |                       |
| Arana-Ami E       | Population based clinical trial with FIT and colonoscopy                   | Spain       | 2017       | 0.952                     | 0.948       | 0.955       | 86.431   | 0.000   |                       |
| Corely D          | Population based clinical trial with FIT and colonoscopy                   | USA         | 2017       | 0.860                     | 0.858       | 0.863       | 179.905  | 0.000   |                       |
| Grazzini G        | Population screening program with FIT and colonoscopy                      | Italy       | 2000       | 0.862                     | 0.815       | 0.898       | 10.343   | 0.000   |                       |
| Choi K 1          | Population screening program with FIT and colonoscopy 1st round            | Korea       | 2012       | 0.179                     | 0.174       | 0.184       | -80.447  | 0.000   |                       |
| Choi K 3          | Population screening program with FIT and colonoscopy 5th round            | Korea       | 2012       | 0.276                     | 0.273       | 0.279       | -111.480 | 0.000   |                       |
| Bravo M           | Population screening program with FIT and colonoscopy                      | Italy       | 2012       | 0.550                     | 0.526       | 0.573       | 4.142    | 0.000   |                       |
| Parente F 2       | Population screening program with FIT and colonoscopy 2nd round            | Italy       | 2012       | 0.930                     | 0.919       | 0.939       | 33.497   | 0.000   |                       |
| Parente F 1       | Population screening program with FIT and colonoscopy 1st round            | Italy       | 2012       | 0.920                     | 0.908       | 0.930       | 32.502   | 0.000   |                       |
| Wu P              | Population screening program with FIT and colonoscopy                      | Taiwan      | 2013       | 0.561                     | 0.533       | 0.589       | 4.218    | 0.000   |                       |
| Abu Hassan M      | Population screening program with FIT and colonoscopy                      | Malaysia    | 2016       | 0.681                     | 0.565       | 0.778       | 2.992    | 0.003   |                       |
| Portilo I         | Population screening program with FIT and colonoscopy                      | Spain       | 2017       | 0.927                     | 0.925       | 0.929       | 147.371  | 0.000   |                       |
| Buron A           | Population screening program with FIT and colonoscopy                      | Spain       | 2017       | 0.840                     | 0.830       | 0.850       | 41.981   | 0.000   |                       |
| Toes-Zoutendijk E | Population screening program with FIT and colonoscopy                      | Netherlands | 2017       | 0.778                     | 0.774       | 0.782       | 105.201  | 0.000   |                       |
| Issaka R          | Population screening program with FIT and colonoscopy                      | USA         | 2017       | 0.556                     | 0.536       | 0.577       | 5.316    | 0.000   |                       |
|                   |                                                                            |             |            | 0.804                     | 0.740       | 0.856       | 7.552    | 0.000   |                       |

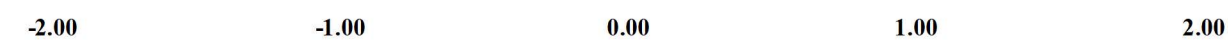



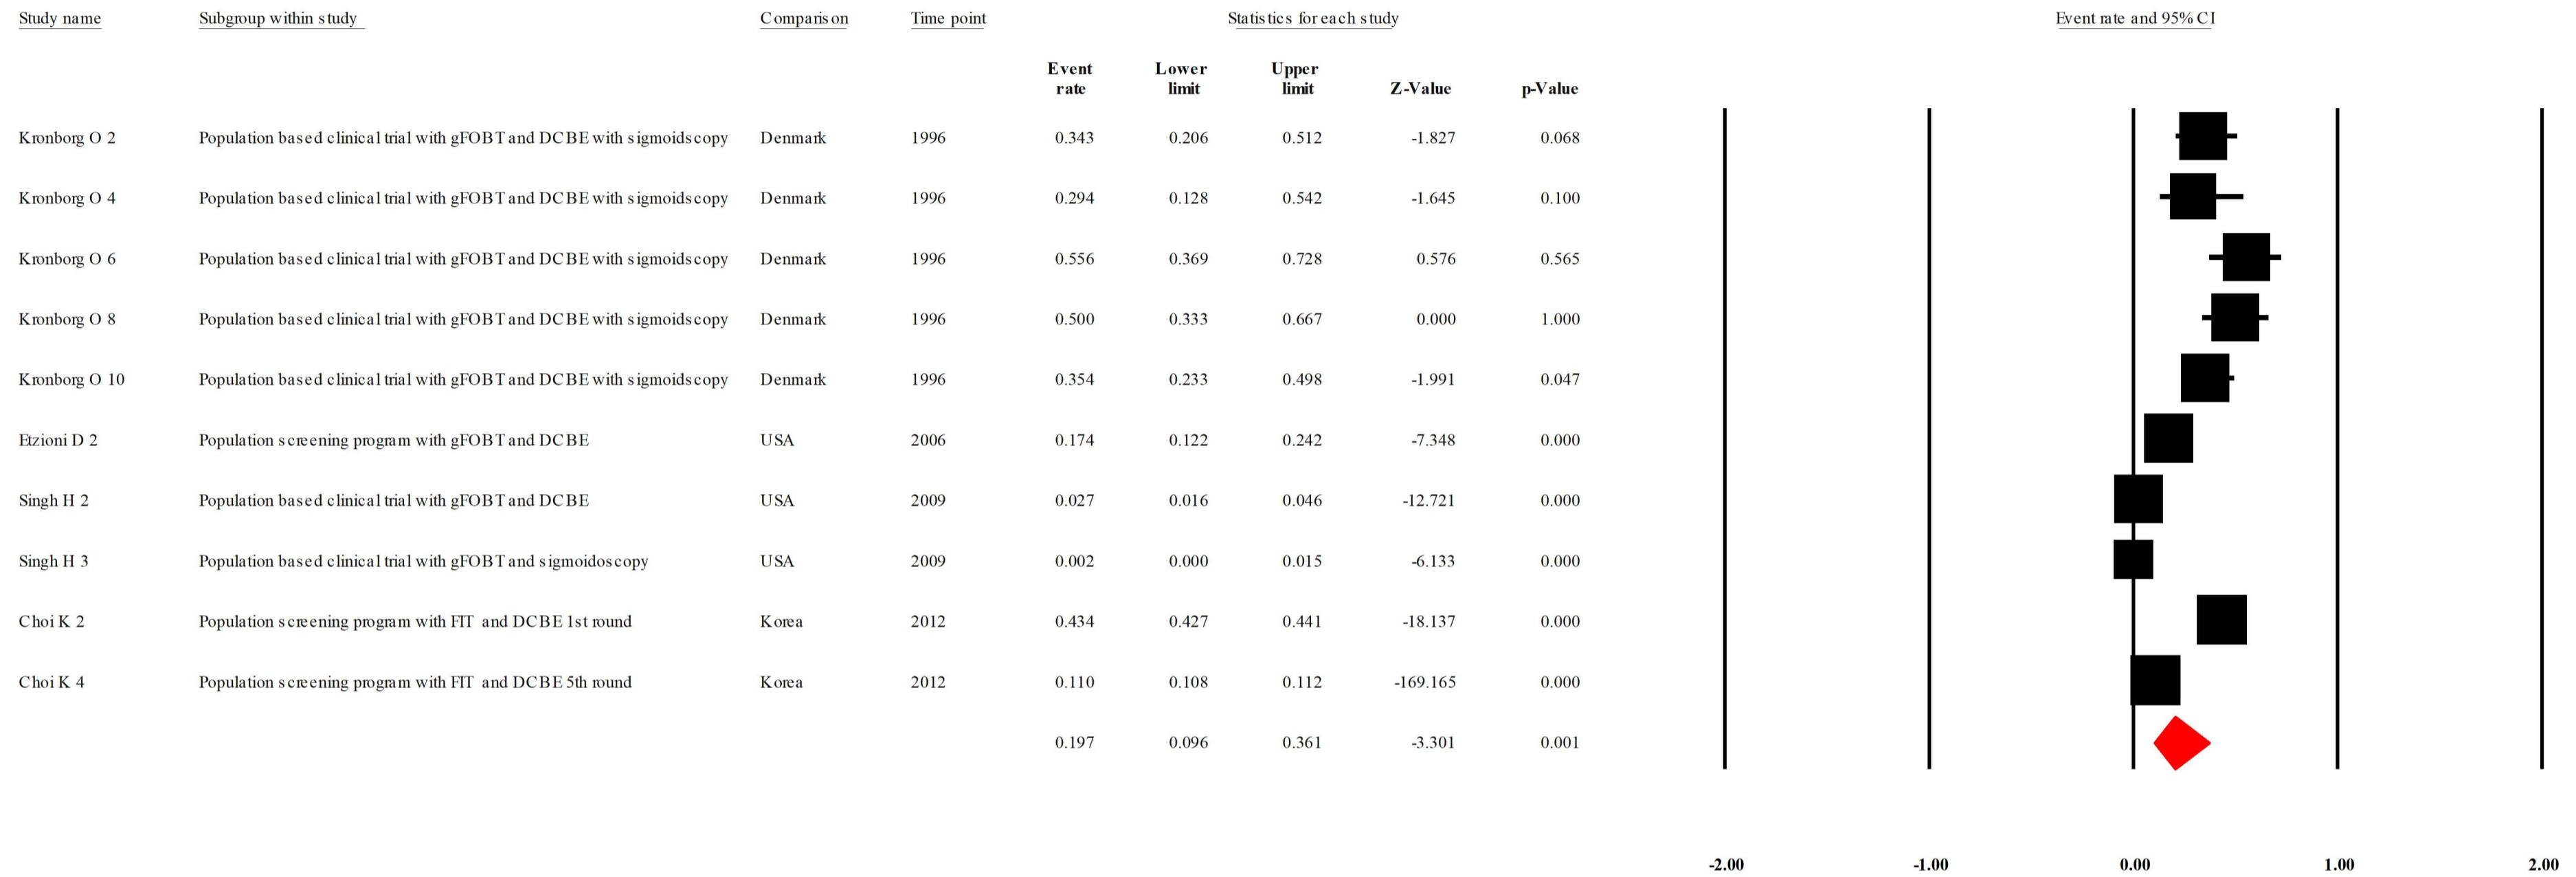

| Study name | Subgroup within study                                           | Comparison | Time point | Statistics for each study |             |             |         |         | Odds ratio and 95% CI |
|------------|-----------------------------------------------------------------|------------|------------|---------------------------|-------------|-------------|---------|---------|-----------------------|
|            |                                                                 |            |            | Odds ratio                | Lower limit | Upper limit | Z-Value | p-Value |                       |
| Etzioni D  | Population screening program with gFOBT and colonoscopy         | USA        | 2006       | 4.832                     | 3.019       | 7.736       | 6.562   | 0.000   |                       |
| Singh H    | Population based clinical trial with gFOBT and colonoscopy      | USA        | 2009       | 20.279                    | 11.458      | 35.893      | 10.332  | 0.000   |                       |
| Choi K     | Population screening program with FIT and colonoscopy 1st round | Korea      | 2012       | 0.284                     | 0.271       | 0.298       | -52.538 | 0.000   |                       |
| Choi K     | Population screening program with FIT and colonoscopy 5th round | Korea      | 2012       | 3.085                     | 2.995       | 3.177       | 74.666  | 0.000   |                       |
|            |                                                                 |            |            | 2.996                     | 0.571       | 15.729      | 1.297   | 0.195   |                       |

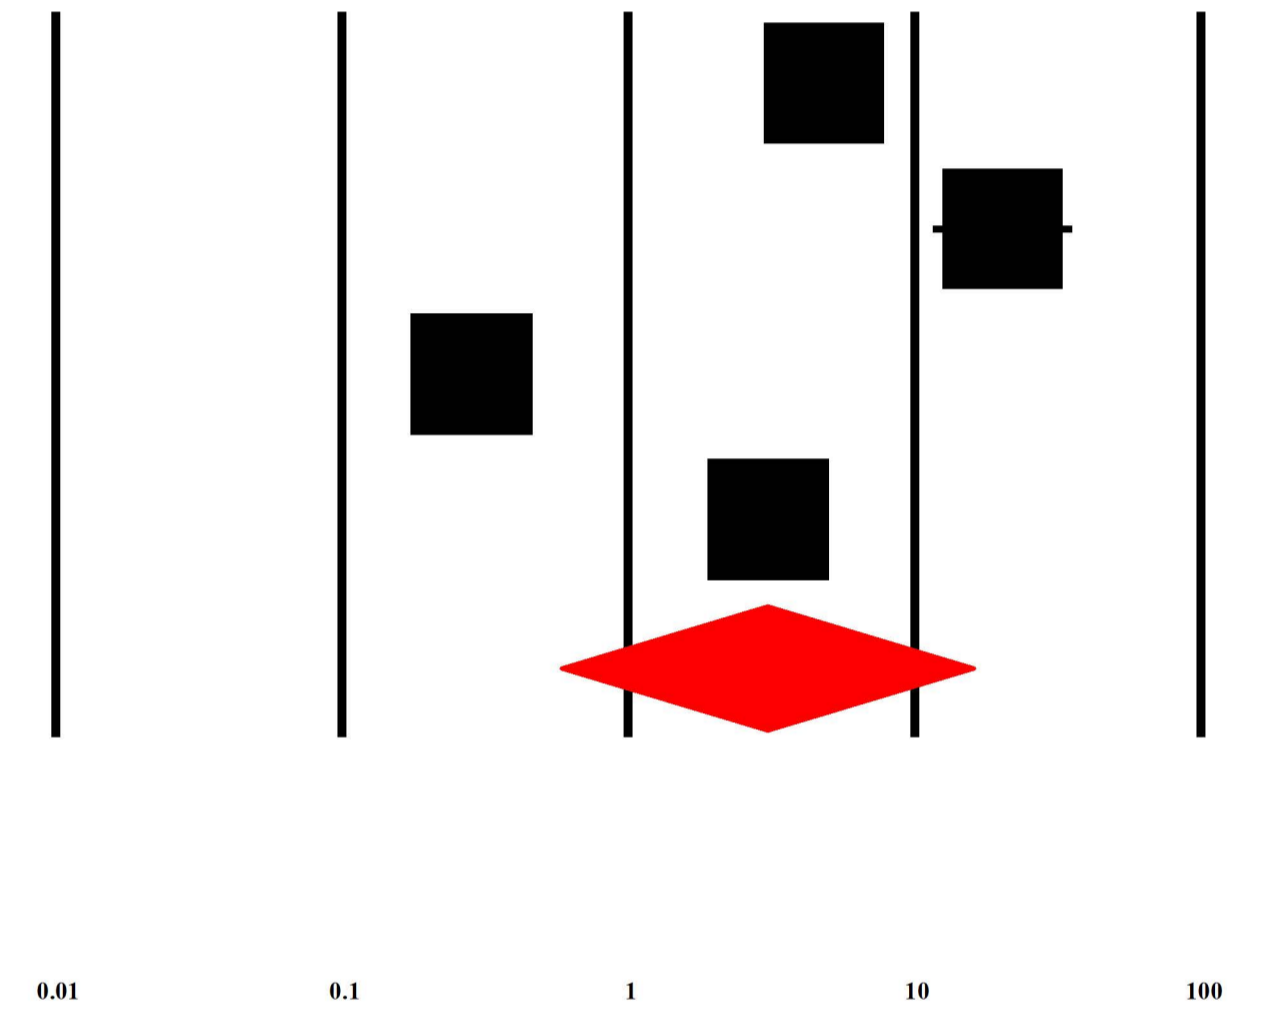

Favors DCBE

Favore colonoscopy
